# Supplementary material for: Transforming Growth Factor-β/Smad Signaling Inhibits Melanoma Cancer Stem Cell Self-Renewal, Tumor Formation and Metastasis
Source: MDPI journal article supplement (doi:10.3390/cancers16010224), 2024-01-03

**Supplementary Table S1.** The sequence of genes in the manuscript.

|                                            |                                       |
|--------------------------------------------|---------------------------------------|
| # Sequence                                 | TGGCGGCGTGAATGGCAAGATGG               |
| # Genome                                   | hg19                                  |
| # PAM                                      | NGG                                   |
| # Position                                 | chr18:45423097-45423120:+             |
| # Version                                  | CRISPOR 5.01, 2023-08-31T19:44:01CEST |
| Chromosomal position of sgRNA binding site | Chr18:47896727-47896749               |
| #guideld                                   | targetSeq                             |
| <b>SMAD2 sg4</b>                           | TGGCGGCGTGAATGGCAAGATGG               |
|                                            |                                       |
| # Sequence                                 | TTCACGATCGGGGGAGTGAAAGG               |
| # Genome                                   | hg19                                  |
| # PAM                                      | NGG                                   |
| # Position                                 | chr15:67358507-67358530:-             |
| # Version                                  | CRISPOR 5.01, 2023-08-31T19:48:51CEST |
| Chromosomal position of sgRNA binding site | Chr15:67066170-67066192               |
| #guideld                                   | targetSeq                             |
| <b>SMAD3 sg2</b>                           | TTCACGATCGGGGGAGTGAAAGG               |
|                                            |                                       |
| # Sequence                                 | AACTCTGTACAAAGACCGCGTGG               |
| # Genome                                   | hg19                                  |
| # PAM                                      | NGG                                   |
| # Position                                 | chr18:48593460-48593483:-             |
| # Version                                  | CRISPOR 5.01, 2023-08-31T19:50:26CEST |
| Chromosomal position of sgRNA binding site | Chr18:51067091-51067113               |
| #guideld                                   | targetSeq                             |
| <b>SMAD4 sg1</b>                           | AACTCTGTACAAAGACCGCGTGG               |
|                                            |                                       |

Supplementary Table S1. *Cont.*

| mitSpecScore | cfdSpecScore | offtargetCount | targetGenomeGeneLocus | Doench '16-Score | OldDoench '16-Score |
|--------------|--------------|----------------|-----------------------|------------------|---------------------|
| 81           | 89           | 84             | exon:SMAD2            | 60               | 59                  |

| mitSpecScore | cfdSpecScore | offtargetCount | targetGenomeGeneLocus | Doench '16-Score | OldDoench '16-Score |
|--------------|--------------|----------------|-----------------------|------------------|---------------------|
| 87           | 92           | 42             | exon:SMAD3            | 53               | 52                  |

| mitSpecScore | cfdSpecScore | offtargetCount | targetGenomeGeneLocus | Doench '16-Score | OldDoench '16-Score |
|--------------|--------------|----------------|-----------------------|------------------|---------------------|
| 94           | 95           | 39             | exon:SMAD4            | 70               | 75                  |

**Supplementary Table S1.** *Cont.*

| Chari-Score | Xu-Score | Wu-Crispr-Score | Doench '14-Score | Wang-Score | Moreno-Mateos-Score |
|-------------|----------|-----------------|------------------|------------|---------------------|
| 84          | 0.16579  | 67              | 24               | 66         | 66                  |

|  |  |  |  |  |  |
|--|--|--|--|--|--|
|  |  |  |  |  |  |
|--|--|--|--|--|--|

| Chari-Score | Xu-Score | Wu-Crispr-Score | Doench '14-Score | Wang-Score | Moreno-Mateos-Score |
|-------------|----------|-----------------|------------------|------------|---------------------|
| 63          | -0.1942  | 0               | 19               | 24         | 63                  |

|  |  |  |  |  |  |
|--|--|--|--|--|--|
|  |  |  |  |  |  |
|--|--|--|--|--|--|

| Chari-Score | Xu-Score | Wu-Crispr-Score | Doench '14-Score | Wang-Score | Moreno-Mateos-Score |
|-------------|----------|-----------------|------------------|------------|---------------------|
| 97          | 0.30044  | 87              | 92               | 81         | 24                  |

|  |  |  |  |  |  |
|--|--|--|--|--|--|
|  |  |  |  |  |  |
|--|--|--|--|--|--|

**Supplementary Table S1. Cont.**

|                        |             |                    |              |                |          |
|------------------------|-------------|--------------------|--------------|----------------|----------|
| Azimuth in-vitro-Score | CCTop-Score | Out-of-Frame-Score | Lindel-Score | GrafEtAlStatus | grafType |
| 55                     | 67.249906   |                    | 72           | 84             | GrafOK   |

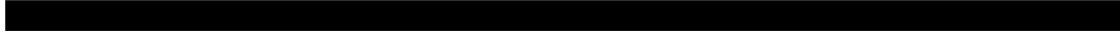

|                        |             |                    |              |                |          |
|------------------------|-------------|--------------------|--------------|----------------|----------|
| Azimuth in-vitro-Score | CCTop-Score | Out-of-Frame-Score | Lindel-Score | GrafEtAlStatus | grafType |
| 59                     | 48.7785995  |                    | 60           | 82             | GrafOK   |

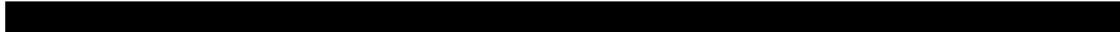

|                        |             |                    |              |                |          |
|------------------------|-------------|--------------------|--------------|----------------|----------|
| Azimuth in-vitro-Score | CCTop-Score | Out-of-Frame-Score | Lindel-Score | GrafEtAlStatus | grafType |
| 20                     | 47.7187295  |                    | 64           | 90             | GrafOK   |

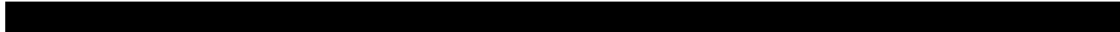

Figure S1. Original Blots: Cropped regions are in red

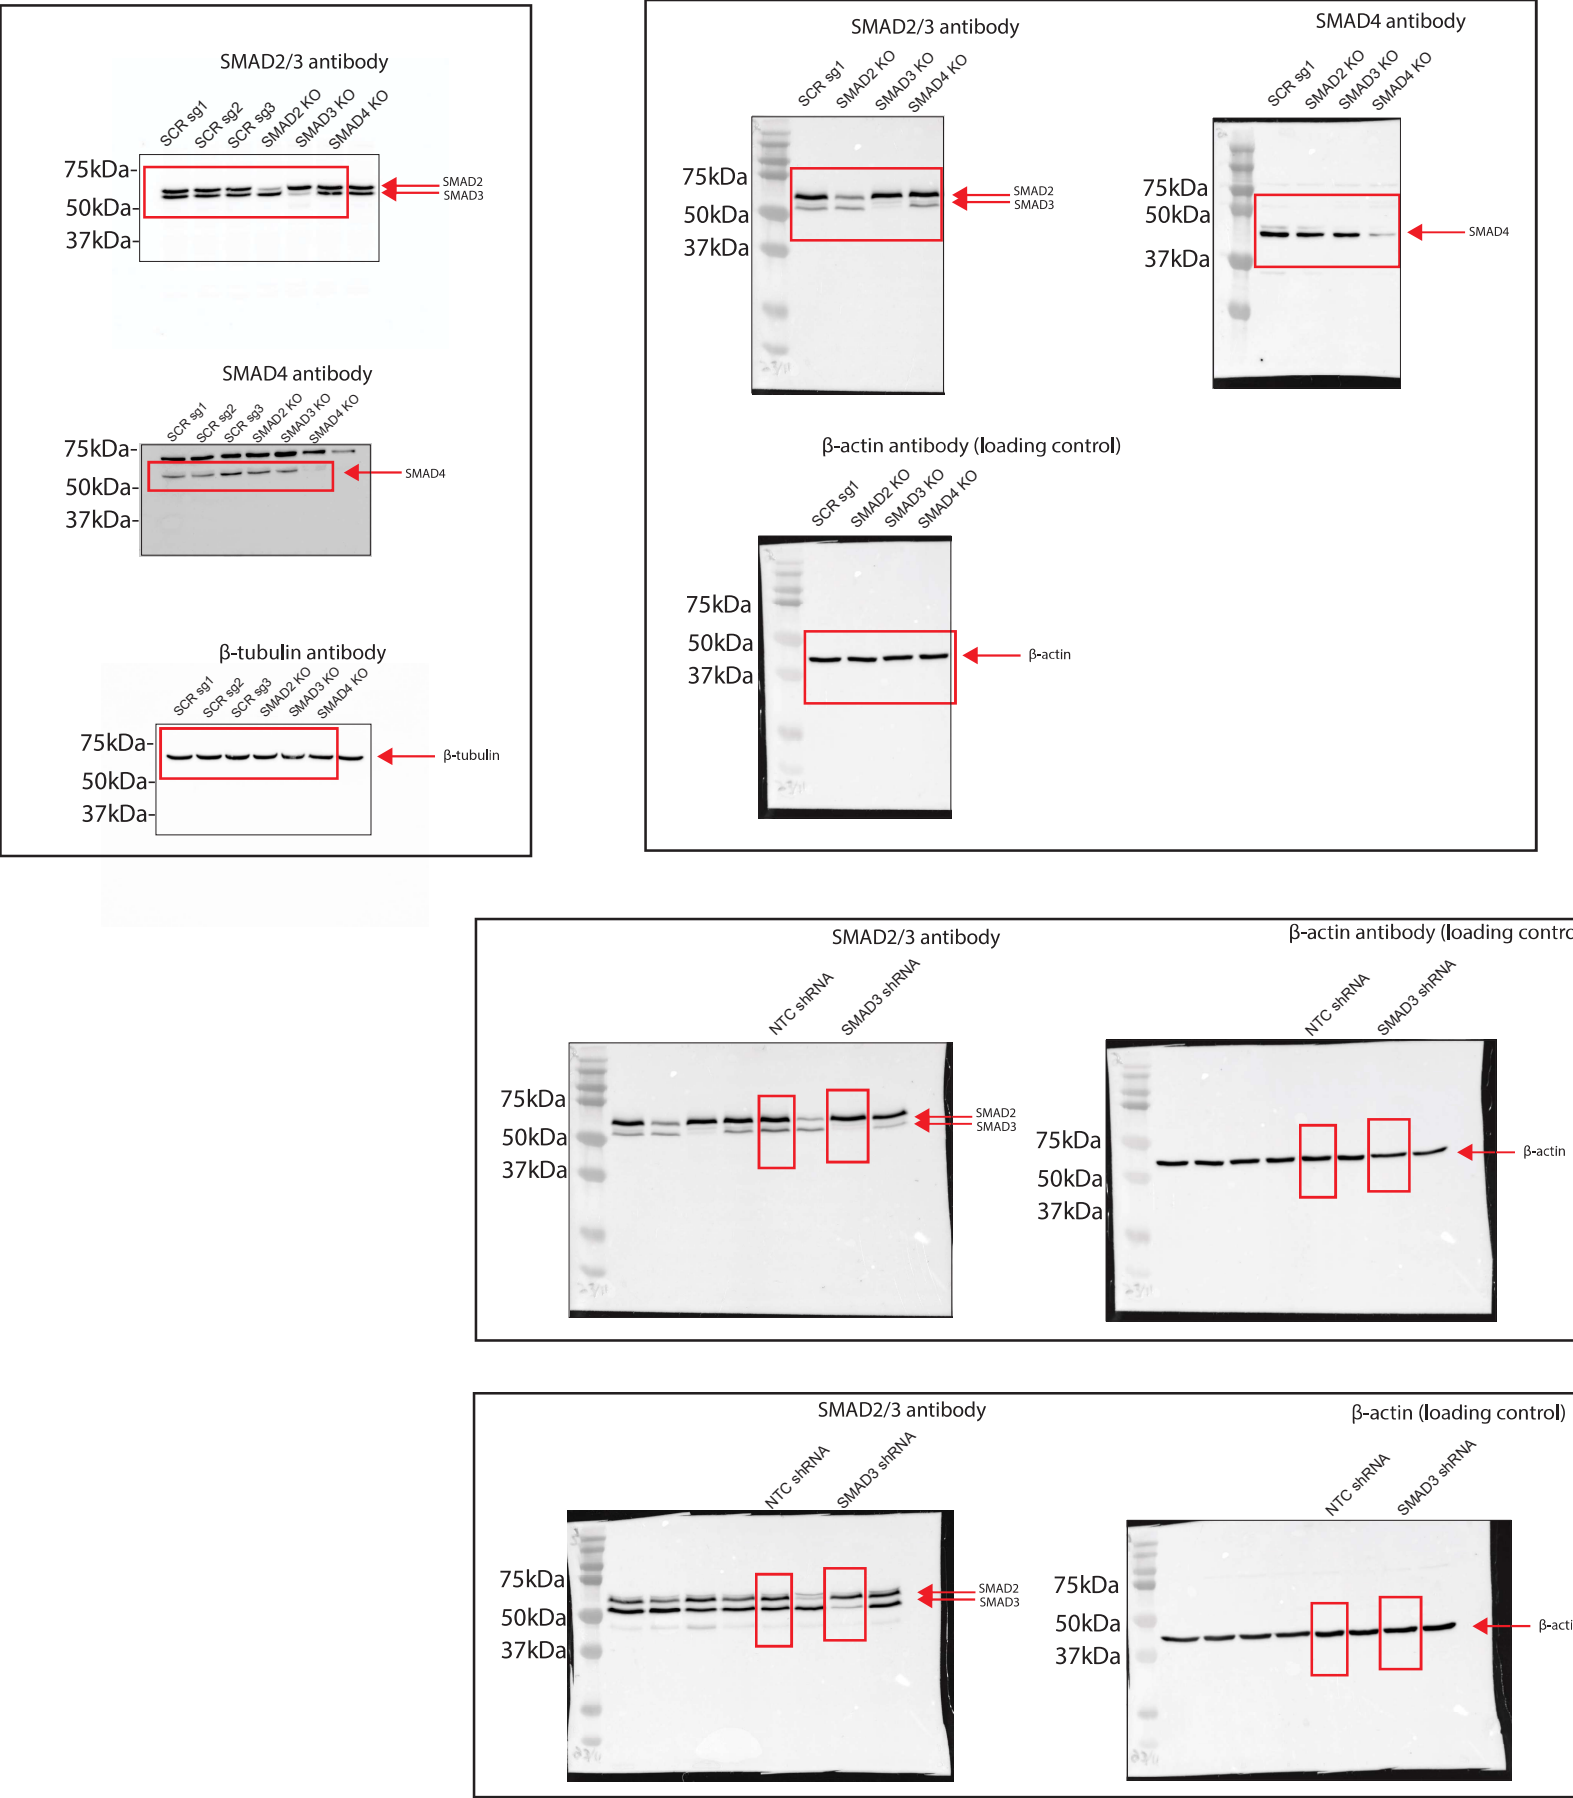

Supplement: s1 [file s1]
